# Supplementary material for: Disposable diaper consumption in sub-Saharan Africa: Estimating the risks of associated unsafe waste
Source: PLOS journal article supplement (doi:10.1371/journal.pstr.0000106), 2024-04-16
Supplement: S2 (10.1371/journal.pstr.0000106.s002) [file journal.pstr.0000106.s002]

| **S2 Table. 2015-2016 characteristics of Kenyan households with children of DWA (n= 4869), households purchasing DDs (n= 1147) and households with a child of DWA that are purchasing DDs (n= 1005)** | | | | | | |
| --- | --- | --- | --- | --- | --- | --- |
| **Characteristic** | **HHs with child of DWA (<24 months)** | | **All HHs purchasing DDs** | | **HHs with child of DWA (<24 months), purchasing DDs** | |
| **Weighted %** | **n (HHs)** | **Weighted %** | ***n (HHs)*** | **Weighted %** | ***n (HHs)*** |
| **Total number of households:** | **100.0** | ***4869*** | **100.0** | ***1147*** | **100.0** | ***1005*** |
| Urban | 36.3 | *1637* | 42.0 | *556* | 57.6 | *520* |
| Rural | 63.7 | *3232* | 58.0 | *591* | 42.4 | *485* |
| **Province** | | | | | | |
| Coast | 10.0 | *620* | 14.2 | *220* | 13.9 | *188* |
| North East | 4.0 | *435* | 0.6 | *27* | 0.6 | *25* |
| Eastern | 12.8 | *746* | 15.5 | *206* | 15.7 | *184* |
| Central | 8.8 | *313* | 7.1 | *87* | 6.7 | *74* |
| Rift Valley | 29.8 | *1607* | 20.5 | *281* | 21.2 | *251* |
| Western | 10.7 | *426* | 7.0 | *77* | 6.9 | *66* |
| Nyanza | 13.9 | *637* | 12.3 | *185* | 12.7 | *165* |
| Nairobi | 10.1 | *85* | 22.9 | *64* | 22.3 | *52* |
| **Waste Disposal Method** | | | | | | |
| Missing/unknown | 0.0 | *10* | 0.1 | *2* | 0.1 | *2* |
| Collected | 14.3 | *325* | 28.2 | *166* | 28.3 | *142* |
| Dumped indiscriminately | 43.0 | *2219* | 35.4 | *455* | 34.5 | *402* |
| Burned by household | 34.7 | *1955* | 29.5 | *437* | 29.8 | *380* |
| Buried by household | 2.8 | *145* | 1.4 | *20* | 1.6 | *18* |
| Unspecified | 5.0 | *215* | 5.4 | *67* | 5.8 | *61* |
